# Supplementary material for: Probing the electronic structure of polynuclear metal clusters with total electron spin S > 1/2 and significant zero-field splitting; Application to the clusters of the nitrogenase MoFe-proteinElectronic supplementary information (ESI) available: Spectral simulations of P. furiosus ferredoxin, of the alternative nitrogenase FeV-cofactor signal and for the FeMo-cofactor from K. pneumoniae under turn-over conditions. See http://www.rsc.org/suppdata/cp/b1/b110486c/
Source: Royal Society of Chemistry journal article supplement (doi:10.1039/b110486c), 2002-04-30
Supplement: figures.doc [file figures.doc]

Supplementary Material

Figure 1s: Powder-type spectral simulation of the X-band S = 3/2 EPR-signal of the reduced [Ni-3Fe-4S]+1 cluster in *P.furiosus* ferredoxin. The parameters used for the simulation were a 'real' g-factor of 2.00, T = 4.5 K, MW = 9.49 GHz, D = - 2.2 cm-1, E/D = 0.18 and a gaussian line width of 70 G.

Figure 2s: Powder-type spectral simulations of the S = 3/2 nitrogenase FeV-cofactor EPR- spectrum as found in the alternative nitrogenase from *A.vinelandii* (Morningstar & Hales, 1987) simulated at the two temperatures of 3.5 K (top) and 5.5 K (bottom). The parameters used for the simulation were a 'real' g-factor of 2.06, MW = 9.32 GHz, D = - 0.74 cm-1, E/D = 0.26 and a gaussian line width of 65 G.

Figure 3s: Powder-type spectral simulations of the EPR- spectral components as measured by Fisher et al. (2001) for Kp1 which shows two spectra under turnover conditions in addition to the more common FeMo-cofactor signal, with inflections at g’ = 4.21 and 3.76 (site b) and g’ = 4.69 (site c) assuming another two inequivalent S = 3/2 nitrogenase FeMo-cofactor environments. Best simulations were obtained for a rhombicity of E/D = 0.038 for site b signals and E/D = 0.127 for the site c resonance for an arbitrary value D equal to that of the resting state FeMo-cofactor.

Figure 1s

Figure 2s

Figure 3s
